## **Efficacy of Transposition of Plicated Medial Rectus Muscles in the Treatment of Pattern Exotropia (A Comparative Study)**

### **Authors and affiliations**

Zagazig University, Ophthalmology department, Zagazig, Egypt.

Lamiaa A. El-aidy, Yasser M. Ibrahim, Mohamed A. Elmarakby, Manar A. Ghali

### **Key messages:**

- A- or V-pattern exotropia without significant inferior oblique overaction can be treated by vertical transposition of the horizontal recti after ordinary recession or resection.
- Vertical Transposition of plicated medial recti is a new promising technique which allows the preservation of ciliary circulation and lowering the incidence of muscle loss.
- We compared the surgical outcome of combined vertical transposition and plication of medial recti versus resection and vertical transposition.
- Results of both techniques were comparable regarding postoperative horizontal and vertical deviations.

### **Abstract**

#### **PURPOSE**

To report effectiveness of bimedial plication and vertical transposition for the correction of exotropia associated with A- or V-pattern and compare it with bimedial resection and vertical transposition.

#### **METHODS**

We retrospectively reviewed the results of surgery of patients who underwent bimedial plication (group I) versus bimedial resection (group II) with vertical offset to correct both exotropia and pattern deviation not secondary to oblique overaction in the period between January 2021 and January 2023. Results of both groups were compared. Success was considered when pattern deviation was  $\leq 8$  prism diopters PD and horizontal deviation was within 10 PD of orthophoria at 6 months postoperatively.

#### **RESULTS**

The mean preoperative angle of exotropia in PD was  $40.6 \pm 7.2$  in group I and  $41.1 \pm 7.5$  in group II ( $p=.8$ ). At 6 months postoperatively, they achieved esotropia of  $4.6 \pm 4.1$  and  $2.5 \pm 4.5$  PD respectively (no significant difference between both groups;  $p=.19$ ). The mean preoperative pattern deviation was  $21.3 \pm 3.7$  PD in group I and  $21.6 \pm 4.4$  in group II. Postoperative pattern collapse was  $16.7 \pm 5.6$  and  $16.6 \pm 4.1$  respectively. The percentage of success in pattern collapse was 90.6% in group I and 84.4% in group II (no significant difference between both groups;  $p=.71$ ).

#### **CONCLUSION**

Vertical transposition with plication of the medial recti is a safe, effective, and rapid technique for the correction of cases of A- or V- pattern exotropia not associated with oblique overaction. Surgical results were comparable to resection and vertical transposition.

**Keywords:** exotropia; pattern strabismus; medial rectus; plication; resection; transposition

### **Introduction**

The amount of horizontal deviation in strabismic patients may differ in upgaze and downgaze apart from the primary position. This difference is called A- and V-patterns or alphabetical patterns [1].

A-pattern is described when the difference in horizontal deviation between upgaze and downgaze is more than 10 PD, with more divergence in downgaze, while V-pattern is described when this difference is more than 15 PD, with more divergence in upgaze [2].

The reported prevalence of A- or V-patterns in patients with horizontal deviation ranges between 20% and 50% in different studies [3].

Many theories were proposed to clarify the etiology of alphabetical patterns, like: oblique muscle overaction or palsy, nerve misdirection such as Duane syndrome, orbital factors as craniofacial abnormalities, heterotopia of muscle pulleys, extraocular muscles' anomalies, and disruption of fusion [4,5].

Exotropia (XT) is an outward deviation of the visual axes, it may be primary, secondary, or consecutive. Primary exotropia can be constant or intermittent [6].

Intermittent exotropia is the most common type of exodeviation. It is a large phoria that can be controlled intermittently by fusional mechanisms and may later progress spontaneously into constant exotropia with loss of control. A- and V-patterns are seen in a large number of patients with typical intermittent exotropia [1,7].

**Shin et al** [7] proposed that the A- or V-patterns in exotropia may be secondary to the mechanical factors of the oblique muscles. When the eye is exotropic, the oblique muscles become slack. Over time, they become shortened, which may lead to the ocular torsion in primary position and pattern deviation. Also, **Miller and Guyton** [8] showed that ocular torsion is secondary to loss of fusion in exotropia, which results in development of A or V pattern strabismus.

The generally-accepted surgical corrections of pattern strabismus include oblique muscle weakening when there is obvious oblique muscle overaction [9,10], and horizontal muscle transposition when there is not [11–13].

However, both procedures can be done together in large patterns [2].

Other approaches include surgery on vertical recti (nasal or temporal horizontal displacement of insertions) and slanting of horizontal recti insertions [14].

Exotropia is a surgical problem. Many options are advocated for the correction of exotropia: unilateral recession resection, bilateral lateral rectus recession or bimedial resection. A three or four-muscle surgery may be done in large angle exotropia [15].

Muscle plication is an alternative surgical procedure to muscle resection, used to strengthen the muscle. It has the benefit of being potentially reversible as well as being better in preserving the anterior ciliary circulation; thus lowering the risk of anterior segment ischemia [16,17].

Plication also reduces the risk of a lost muscle, and it can be performed using adjustable-suture techniques [14].

The combination of both vertical transposition and plication of the horizontal recti is a novel technique used for the correction of cases with both vertical and horizontal strabismus [14,16].

In this retrospective cohort study, we chose cases with primary exotropia — either constant or intermittent — associated with pattern deviation who underwent either medial rectus muscle plication and transposition or the standard technique in which resection is done instead of plication with either superior or inferior transposition according to type of pattern (A or V). We hypothesized that this technique is as effective as bimedial resection and transposition. However, Bimedial plication and transposition will offer advantages regarding safety, short operation time as well as decreasing incidence of postoperative anterior segment ischemia.

### **Subjects and methods**

The study was approved by the Zagazig University Institutional Review Board (IRB). Informed consent was taken from patients or the parents (for children less than 16 years old). All surgeries were performed at Ophthalmology department of Zagazig University Hospitals.

The medical records of patients diagnosed with A- or V- pattern exotropia with no or minimal oblique overaction, who underwent strabismus surgery between January 2021 and January 2023; were retrospectively reviewed. Only patients with primary exotropia (either constant or intermittent) with angle of deviation  $\geq 30$  and  $\leq 55$  PD; were included. A-pattern exotropia was included when the difference in exodeviation between upgaze and downgaze was more than  $10\Delta$ , and V-pattern when this difference was more than  $15\Delta$ . Age ranged from 4 to 50 years old.

Patients with oblique muscle overaction ( $\geq +2$ ), sensory exodeviation, anisometropia  $\geq 5$  diopters, axial length  $< 22.5$  or  $> 25$  mm, associated dissociated vertical deviation DVD, or less than 6 months' follow-up were excluded.

Preoperative data collected included best corrected visual acuity in Snellen decimal, cycloplegic refraction (using 1% cyclopentolate chloride) with retinoscopy or autorefractometry, extraocular muscle movement, degree of ocular deviation in primary position at distance (6 meters) and at near (1/3 meter) by prism and alternate cover test, horizontal deviation at 1/3 meter (in upgaze and downgaze, about 25 degrees up and down respectively without glasses to avoid prismatic effect of spectacle correction), pattern deviation is the difference in horizontal deviation between up and downgazes, oblique muscle overaction grading from +1 to +4 [18], stereoacuity at near by Titmus test (with poor being  $>200$  arcsec and moderate being between 80 and 100), slit lamp examination of the anterior segment and fundus examination by indirect ophthalmoscope. According to the surgical procedure performed, two groups of patients were identified, each group was further divided into 2 subgroups A and V referring to A- and V-patterns: 1) Group I (32 patients) underwent bilateral medial rectus plication and vertical transposition, 2) Group II (control group, 32 patients) underwent bimedial resection and vertical transposition. The amount of A- and V-pattern collapse (the difference between pre and postoperative pattern deviation) was calculated at 1 month

and 6 months postoperatively. Success was considered when pattern deviation was  $\leq 8$  PD at 6 months postoperatively. Success in horizontal deviation was considered when deviation was 10 PD within orthophoria at 6 months postoperatively.

### Surgical technique

All surgical procedures were performed under general anesthesia by the same surgeon (MG). Surgery was performed using a limbal approach, about 3 hours medially with 2 horizontal releases. The medial rectus muscle was exposed and freed from the Tenon's tissue to the planned distance for resection or plication.

For the plication (Figure 1), one double-armed 6-0 Vicryl suture was passed through the center and both muscle edges at the desired distance from the muscle's insertion and locked. Then, each suture was placed toward the site of transposition. For example, if we targeted to transpose the medial rectus a full tendon width superiorly, the inferior suture was passed under the medial rectus to the superior edge of muscle insertion. The superior suture was passed partial thickness through the sclera, just anterior to the muscle insertion, with a vertical offset about 8-10 mm. Then, the inferior suture was passed through the sclera approximately at the superior edge of the insertion. Both sutures were tied together which resulted in a triangular fold in the muscle.

For the resection, two single-armed Vicryl sutures were passed through both muscle edges at the desired distance from the muscle insertion and tied, then the muscle was disinserted from the globe and resected just anterior to the previously-passed sutures. The muscle was then transposed and secured to the sclera at the desired position with partial-thickness scleral passes.

In the A-pattern group, medial recti were displaced upward (toward the apex of the pattern) by 5 mm if the difference between up and downgazes was  $10 \leq 20$  PD and 8-10 mm if  $> 20$  PD. In the V-pattern group, they were displaced downward by 5 mm if the difference between up and downgazes was  $15 \leq 25$  PD and 8-10 mm if the difference  $> 25$  PD.

The amount of horizontal muscle operation was done according to Kenneth Wright's tables for strabismus [19].

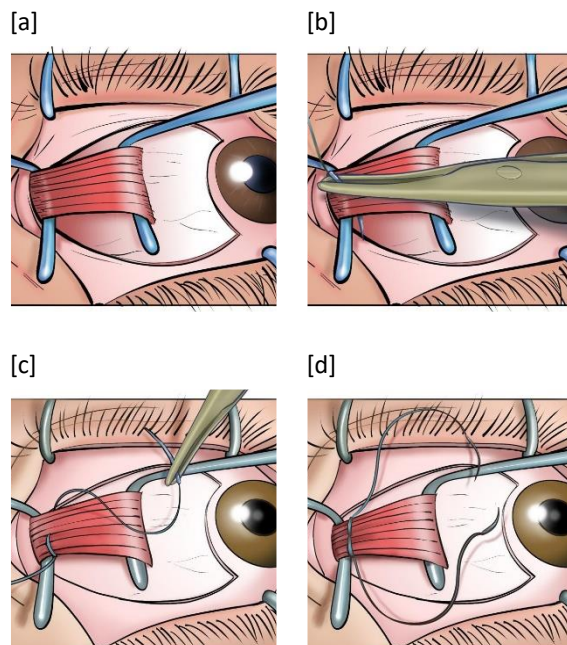

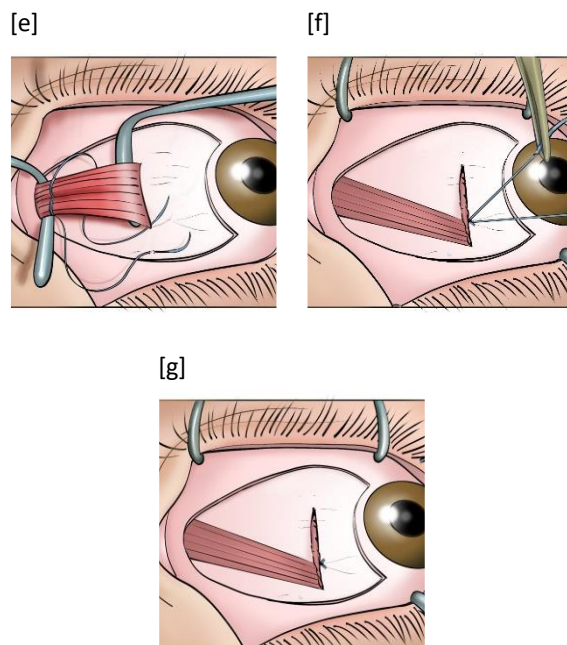

Figure 1.

Medial rectus muscle plication and vertical transposition. **a** The medial rectus is stretched between the two muscle hooks. **b** A single double-armed Vicryl suture was passed through the muscle center to the superior edge. **c** The suture was passed to the inferior edge after locking the superior one. **d** Picture after locking both sutures. **e** Inferior suture was passed through the sclera at the superior pole of muscle insertion and the superior suture was passed through the sclera a full-tendon-width above the first scleral path. **f** Position of the muscle after tying the sutures. **g** Final appearance of the folded and transposed muscle.

### Statistical analysis

The collected data was analyzed using the Statistical Package for the Social Sciences (SPSS) version 28 (IBM Corp., Armonk, NY, USA). Data was double checked for normality using normality plots and Shapiro-Wilk test. Data was summarized using mean and standard deviation in quantitative data and using frequency (count) and relative frequency (percentage) for categorical data. Comparisons between groups were done using unpaired t-test in normally distributed quantitative variables while non-parametric Mann-Whitney test was used for non-normally distributed quantitative variables. Comparison between pre- and postoperative values was done using paired t-test in normally distributed quantitative variables while non-parametric Friedman test and Wilcoxon signed rank test were used for non-normally distributed quantitative variables (**Chan, 2003a**). For comparing categorical data, Chi square ( $\chi^2$ ) test was performed. Exact test was used instead when the expected frequency was less than 5 (**Chan, 2003b**). p-values less than 0.05 were considered significant.

### Results

64 patients were reviewed, 32 were treated with bilateral medial rectus plication and vertical transposition (Group I) and 32 patients treated with bilateral medial rectus resection and vertical transposition (Group II). Each group was further divided into two subgroups: A and V. The mean age of all patients at the time of operation was  $15.95 \pm 12.79$  years (range: 4-50). Table 1 shows the preoperative criteria in both groups (no significant difference between both groups).

*Table 1: Preoperative data for the studied groups*

| Variables                                                | Group I (n=32)             | Group II (n=32)            | p value |
|----------------------------------------------------------|----------------------------|----------------------------|---------|
| Age in years: mean $\pm$ SD (range)                      | 16.1 $\pm$ 12.7 (4-50)     | 15.8 $\pm$ 13.1 (4-50)     | 0.82    |
| Male sex: No. (percent)                                  | 15 (46.9)                  | 17 (53.1)                  | 0.62    |
| A pattern: No. (percent)                                 | 12 (37.5)                  | 11 (34.4)                  | 0.79    |
| V pattern: No. (percent)                                 | 20 (62.5)                  | 21 (65.6)                  | 0.79    |
| Preoperative angle of XT in PD: mean $\pm$ SD (range)    | 40.6 $\pm$ 7.2 (30-55)     | 41.1 $\pm$ 7.5 (30-55)     | 0.8     |
| Preoperative pattern in PD: mean $\pm$ SD (range)        | 21.3 $\pm$ 3.7 (15-30)     | 21.6 $\pm$ 4.4 (15-35)     | 0.73    |
| Refraction: mean $\pm$ SD (range)                        | 0.24 $\pm$ 3.09 (-5.5-6)   | 0.06 $\pm$ 3.1 (-5.5-4.75) | 0.82    |
| BCVA: mean $\pm$ SD (range)                              | 0.78 $\pm$ 0.16 (0.4-1)    | 0.80 $\pm$ 0.17 (0.4-1)    | 0.58    |
| Preoperative stereopsis in arcsec: mean $\pm$ SD (range) | 568.4 $\pm$ 70.8 (400-750) | 554.7 $\pm$ 65.3 (400-700) | 0.42    |

No., number; SD, standard deviation; XT, exotropia; PD, prism diopters; BCVA, best corrected visual acuity

*Table 2: Intraoperative and postoperative data in both groups*

| Variables                                                   | Group I (n= 32)            | Group II (n= 32)           | p value |
|-------------------------------------------------------------|----------------------------|----------------------------|---------|
| Amount of MR plication/resection, mm, mean $\pm$ SD (range) | 4.6 $\pm$ 0.8 (3.5-6)      | 4.6 $\pm$ 0.8 (3-6)        | 0.87    |
| Amount of MR transposition, mm, mean $\pm$ SD (range)       | 6.1 $\pm$ 2.1 (5-10)       | 6.1 $\pm$ 2.1 (5-10)       | 1       |
| Postoperative XT at 1 m, PD, mean $\pm$ SD (range)          | 2 $\pm$ 5.4 (-5 to 15) *   | 1.1 $\pm$ 7.3(-10 to 25)   | 0.33    |
| Postoperative XT at 6 m, PD, mean $\pm$ SD (range)          | -4.6 $\pm$ 6.0 (-20 to 12) | -2.5 $\pm$ 6.5 (-20 to 15) | 0.19    |
| Pattern collapse                                            | 16.7 $\pm$ 5.6             | 16.1 $\pm$ 4.1             | 0.65    |
| Postoperative stereopsis, arcsec, mean $\pm$ SD (range)     | 149.2 $\pm$ 43.8 (70-210)  | 157.3 $\pm$ 34.01 (80-210) | 0.56    |

MR, medial rectus; XT, exotropia; minus sign refers to esotropia and vice versa.

Table 2 shows the intraoperative data and the postoperative outcomes in both groups. Postoperative angles at 6 months were  $4.6 \pm 6.0$  and  $2.53 \pm 6.5$  PD esodeviation respectively (no significant difference in both groups regarding postoperative horizontal deviation,  $p=0.185$ ). No significant difference between both groups was detected regarding stereopsis as a sensory outcome.

Regarding vertical deviation, the mean preoperative pattern deviation (difference in prism diopters between up and down gazes) was  $21.3 \pm 3.7$  PD in group I, with a postoperative pattern collapse of  $16.7 \pm 5.6$ . In group II, the mean preoperative pattern deviation was  $21.6 \pm 4.4$ , with a postoperative pattern collapse of  $16.1 \pm 4.1$ . Change between pre and postoperative pattern deviation was significant in each group. The percentage of success in pattern collapse (pattern deviation  $\leq 8$  PD) was 90.6% in group I and 84.4% in group II. There was no significant difference in success between both groups ( $p=.708$ ). There were no intra or postoperative complications recorded.

The results of the subgroups regarding pattern deviation are shown in table 3.

**Table 3: Preoperative pattern and postoperative surgical correction in subgroups (Mean  $\pm$ SD)**

|                                                         | Group I          |                  | Group II         |                  |
|---------------------------------------------------------|------------------|------------------|------------------|------------------|
|                                                         | A pattern (n=12) | V pattern (n=20) | A pattern (n=11) | V pattern (n=21) |
| <b>Preoperative pattern</b>                             | $21.3 \pm 3.8$   | $21.3 \pm 3.7$   | $20.5 \pm 4.2$   | $22.2 \pm 4.4$   |
| <b>Postoperative pattern</b>                            | $5.4 \pm 5.3$    | $4.1 \pm 3.2$    | $5.4 \pm 5.6$    | $5.5 \pm 3.9$    |
| <b>p value* (between pre- and postoperative values)</b> | 0.002*           | <0.001*          | 0.003*           | <0.001*          |
| <b>Surgical success in pattern, No., percent</b>        | 10 (83.3)        | 19 (95.0)        | 9 (81.8)         | 18 (85.7)        |

No., number; \*significant (Non-parametric Wilcoxon signed rank test)

## Discussion

Detection of pattern deviation in cases of exotropia or horizontal deviation — in general — is very important before determining surgical intervention. Unrecognized patterns may lead to either postoperative over or undercorrection or may raise the need for more surgeries to improve the undesirable surgical outcomes [2].

Pattern deviation can be corrected either by oblique muscle surgery in cases with significant oblique muscle overaction or with horizontal muscles transposition in cases without oblique overaction.

In this retrospective study, we chose only cases with primary exotropia either intermittent or constant with no oblique overaction. We compared the effect of bimedial plication and transposition as a novel technique with bimedial resection and transposition as the standard.

Muscle transposition was prescribed in literature either by doing complete muscle disinsertion as in the Knapp procedure or without muscle disinsertion as in the Nishida procedure. However, both don't have a strengthening effect; they aimed only to change the pulling force of the muscle [14].

**Gokyigit B et al** [14,20] were the first to present this technique (rectus plication and transposition) and named it "sliding shape extraocular muscle transposition with plication procedure (SSMTP)". There were 10 cases in their study (out of 17 cases) with exotropia and vertical deviation, 5 of them were treated by medial rectus plication and transposition as a primary surgical intervention except one case who had done one surgery before. There was no anterior segment ischemia even in cases who had done 3 recti muscles surgery on the same eye. Of ten cases of exotropia, five achieved pattern deviation of less than or equal 8 PD, and three achieved horizontal deviation within 10 PD of orthophoria. They prescribed this technique to be safe, effective, and with good results on long-term follow-up (between 24 and 40 months). Results of the current study differed from **Gokyigit B et al** in that our sample size was larger (32 patients) and we chose only cases of primary exotropia. However, the follow up period was shorter (6 months).

Additionally, **Shah PR& Pihlblad MS** [16] published a report of 4 successful cases of complex horizontal and vertical squint, who were treated with unilateral recession/plication with vertical transposition. The technique was effective, and all four cases achieved the required ocular alignment for both horizontal and vertical deviations. No ischemia occurred even in cases with previous squint surgery in the same eye.

In our study, both horizontal and vertical successes were achieved in both groups. Success in horizontal deviation was defined as being within 10 PD of orthophoria at 6 months postoperatively. The percentage of success in group I was 81.3% (26 out of 32 patients) and in group II was 84.4% (27 out of 32), no significant difference between both groups,  $p=0.74$ . **Yagasaki T et al** [21] also reported better results with bimedial resection in cases of infantile exotropia when compared to bilateral lateral rectus recession or unilateral recession/resection, success rate of bimedial resection was 88 % at 6 months versus 18 % for other groups.

According to pattern deviation, a difference of 8 PD or less between up and downgaze was considered successful. Success was 90.6% (29 patients) in group I and 84.4% (27 patients) in group II ( $p=.708$ ) at 6 months postoperatively. Pattern collapse was  $16.72 \pm 5.60$  PD in group I and  $16.16 \pm 4.06$  in group II ( $p=.647$ ).

According to the surgical design in group I, we used a limbal approach and a double armed 6/0 Vicryl suture which passed from the muscle center to the periphery in both sides and was tied. The two sutures were then tied after passing through partial scleral thickness.

In **Shah and Pihlblad's** study, fornix approach was used and two separate single-armed polyglactin sutures were passed at the muscle edges and tied. **Gokyigit B et al** used limbal approach and either single- or double-armed sutures. In six patients, they added a central 6/0 Dacron suture to make the whole muscle edge at the same plication line to maintain the effect of plication.



We believe that our technique avoids muscle splitting and decreases the need for a central muscle suture to enforce the effect of plication. Although the peripheral sutures were believed to avoid tying of the anterior ciliary vessels, no case of anterior segment ischemia was present in our study. One disadvantage we noticed was that sheath wiring of the sclera may occur after tying the sutures if the scleral paths are too superficial. This can be avoided by proper passage through the sclera and avoiding superficial paths.

Our results in plication and resection were comparable with no significant difference between both groups. This is like many studies which recorded similar results between plication and resection [22–24].

Anterior segment ischemia is a rare complication of strabismus surgery which occurs secondary to muscle disinsertion either by recession or resection. The risk increases if three muscles are operated on in the same eye. Plication offers a good alternative to muscle resection with preservation of anterior ciliary circulation especially in surgeries where 3-muscle surgery is needed [23].

The unsuccessful cases in pattern collapse were 3 (9.4%) in group I and 5 (15.6%) in group II ( $p=.708$ ). The causes of residual pattern may be related to unrecognized oblique overaction, inaccurate measurements of pattern preoperatively, or improper execution of the surgical technique.

The age, demographic and preoperative data were comparable with no significant differences in both groups. Other strength points in our study were: the presence of a control group and the average follow-up period of 6 months.

However, a larger sample is needed, and a longer follow-up period is recommended to address the long-term effects of the new technique.

In conclusion, we find that horizontal transposition of plicated medial rectus muscle is a safe, rapid, effective, and simple technique for the correction of primary exotropic patients with A- or V-pattern not secondary to oblique muscle overaction.

## References

- [1] K. W. Wright, “Alphabet Patterns and Oblique Muscle Dysfunctions,” in *Handbook of Pediatric Strabismus and Amblyopia*, K. W. Wright, P. H. Spiegel, and L. S. Thompson, Eds., New York, NY: Springer New York, 2006, pp. 284–322. doi: 10.1007/0-387-27925-3\_9.
- [2] H. T. Sekeroglu, K. E. Turan, S. Uzun, E. C. Sener, and A. S. Sanac, “Horizontal muscle transposition or oblique muscle weakening for the correction of V pattern?,” *Eye*, vol. 28, no. 5, pp. 553–556, May 2014, doi: 10.1038/eye.2014.16.
- [3] S. M. Straight and R. S. Bahl, “A- and V-Pattern Strabismus,” in *Practical Management of Pediatric Ocular Disorders and Strabismus: A Case-based Approach*, E. Traboulsi and V. Utz, Eds., New York, NY: Springer New York, 2016, pp. 583–592. doi: 10.1007/978-1-4939-2745-6\_54.
- [4] B. J. Kushner, “Effect of ocular torsion on A and V patterns and apparent oblique muscle overaction.,” *Arch Ophthalmol*, vol. 128, no. 6, pp. 712–718, Jun. 2010, doi: 10.1001/archophthalmol.2010.88.
- [5] Y. B. Lee *et al.*, “Effect of horizontal rectus surgery for the correction of intermittent exotropia on sub-A or sub-V pattern.,” *PLoS One*, vol. 12, no. 6, p. e0179626, 2017, doi: 10.1371/journal.pone.0179626.
- [6] A. Ansons and H. Davis, *Diagnosis and Management of Ocular Motility Disorders: Fourth Edition*. 2013, p. 720. doi: 10.1002/9781118712368.
- [7] K. H. Shin, H. J. Lee, and H. T. Lim, “Ocular torsion among patients with intermittent exotropia: relationships with disease severity factors.,” *Am J Ophthalmol*, vol. 155, no. 1, pp. 177–182, Jan. 2013, doi: 10.1016/j.ajo.2012.07.011.
- [8] M. M. Miller and D. L. Guyton, “Loss of fusion and the development of A or V patterns.,” *J Pediatr Ophthalmol Strabismus*, vol. 31, no. 4, pp. 220–224, Aug. 1994, doi: 10.3928/0191-3913-19940701-06.

- [9] K. Kumar, H. N. Prasad, S. Monga, and R. Bhola, “Hang-back recession of inferior oblique muscle in V-pattern strabismus with inferior oblique overaction,” *Journal of American Association for Pediatric Ophthalmology and Strabismus*, vol. 12, no. 4, pp. 401–404, Aug. 2008, doi: 10.1016/j.jaapos.2008.01.015.
- [10] S. Akar, B. Gökyiğit, and O. F. Yilmaz, “Graded anterior transposition of the inferior oblique muscle for V-pattern strabismus,” *J AAPOS*, vol. 16, no. 3, pp. 286–290, Jun. 2012, doi: 10.1016/j.jaapos.2012.01.009.
- [11] Y. Oya, T. Yagasaki, M. Maeda, M. Tsukui, and K. Ichikawa, “Effects of vertical offsets of the horizontal rectus muscles in V-pattern exotropia without oblique dysfunction,” *J AAPOS*, vol. 13, no. 6, pp. 575–577, Dec. 2009, doi: 10.1016/j.jaapos.2009.09.017.
- [12] A. M. Mostafa and R. R. Kassem, “A comparative study of medial rectus slanting recession versus recession with downward transposition for correction of V-pattern esotropia,” *J AAPOS*, vol. 14, no. 2, pp. 127–131, Apr. 2010, doi: 10.1016/j.jaapos.2009.11.025.
- [13] A. Dickmann *et al.*, “Effect of vertical transposition of the medial rectus muscle on primary position alignment in infantile esotropia with A- or V-pattern strabismus,” *J AAPOS*, vol. 15, no. 1, pp. 14–16, Feb. 2011, doi: 10.1016/j.jaapos.2010.11.017.
- [14] B. Gokyigit *et al.*, “Long-term results of ‘sliding shape muscle transposition with plication’ operation,” *Journal of American Association for Pediatric Ophthalmology and Strabismus*, vol. 23, no. 4, p. e30, Aug. 2019, doi: 10.1016/j.jaapos.2019.08.106.
- [15] Z. I. Currie, T. Shipman, and J. P. Burke, “Surgical correction of large-angle exotropia in adults,” *Eye (Lond)*, vol. 17, no. 3, pp. 334–339, Apr. 2003, doi: 10.1038/sj.eye.6700347.
- [16] P. R. Shah and M. S. Pihlblad, “Transposition of plicated horizontal muscles,” *Journal of American Association for Pediatric Ophthalmology and Strabismus*, vol. 24, no. 4, pp. 244–247, Aug. 2020, doi: 10.1016/j.jaapos.2020.04.008.
- [17] K. W. Wright, “Rectus Muscle Plication Procedure,” *JAMA Ophthalmology*, vol. 133, no. 2, pp. 226–227, Feb. 2015, doi: 10.1001/jamaophthalmol.2014.4259.
- [18] K. W. Wright and Y. N. J. Strube, “Inferior Oblique Muscle Weakening Procedures,” in *Color Atlas Of Strabismus Surgery: Strategies and Techniques*, Fourth edition., K. W. Wright and Y. N. J. Strube, Eds., New York, NY: Springer New York, 2015, pp. 135–136. doi: 10.1007/978-1-4939-1480-7\_5.
- [19] K. W. Wright and Y. N. J. Strube, “Appendix A: Surgical numbers,” in *Color Atlas Of Strabismus Surgery: Strategies and Techniques*, Fourth edition., K. W. Wright and Y. N. J. Strube, Eds., New York, NY: Springer New York, 2015, pp. 191–192. doi: 10.1007/978-1-4939-1480-7\_5.
- [20] B. Gokyigit, A. Inal, O. B. Ocak, and E. D. Aygıt, “Sliding shape extraocular muscle transposition with plication: Long-term results,” *Int Ophthalmol*, vol. 41, no. 11, pp. 3593–3598, Nov. 2021, doi: 10.1007/s10792-021-01932-9.
- [21] T. Yagasaki, Y. Yokoyama, A. Yagasaki, and M. Tsukui, “Effects of Bilateral Medial Rectus Resection on Motor Outcomes in Infantile Exotropia,” *Clin Ophthalmol*, vol. 16, pp. 2047–2056, 2022, doi: 10.2147/OPTH.S370266.
- [22] Y. Kimura and T. Kimura, “Comparative study of plication–recession versus resection–recession in unilateral surgery for intermittent exotropia,” *Japanese Journal of Ophthalmology*, vol. 61, no. 3, pp. 286–291, May 2017, doi: 10.1007/s10384-017-0501-5.
- [23] P. A. Huston and D. L. Hoover, “Surgical outcomes following rectus muscle plication versus resection combined with antagonist muscle recession for basic horizontal strabismus,” *J AAPOS*, vol. 22, no. 1, pp. 7–11, Feb. 2018, doi: 10.1016/j.jaapos.2017.09.004.
- [24] M. Stunkel, A. J. Cantor, and D. A. Plager, “Intermediate-term outcomes of horizontal muscle plication versus resection,” *Journal of American Association for Pediatric Ophthalmology and Strabismus*, 2021, [Online]. Available: <https://api.semanticscholar.org/CorpusID:240618297>

## Acknowledgements

None.

## Funding

None.

**Availability of data and materials.** The datasets used and/ or analyzed during the current study are available from the corresponding author on reasonable request.

### **Author information**

**Authorship.** All authors meet the International Committee of Medical Journal Editors (ICMJE) criteria for authorship for this manuscript, take responsibility for the integrity of the work as a whole, and have given final approval for this version to be published.

**Author contributions.** All authors contributed to the study conception and design. Material preparation, data collection and analysis were performed by LAE and MAG. The first draft of the manuscript was written by LAE and all authors commented on previous versions of the manuscript. All authors read and approved the final manuscript.

### **Corresponding author**

Correspondence to Lamiaa A. El-aidy

[lelaidy@outlook.com](mailto:lelaidy@outlook.com)

ORCID 0009-0005-8972-1588

### **Statements and Declarations**

### **Ethics approval and consent to participate**

This study followed the tenets of the Declaration of Helsinki and was approved by Zagazig University Institutional Review Board (IRB). Informed consent was taken from patients or the parents (for children less than 16 years old).

### **Consent for publication**

Not applicable.

**Competing Interests:** All named authors declare that they have no competing interests.
